# Supplementary material for: Engineered human blood–brain barrier microfluidic model for vascular permeability analyses
Source: Springer Nature journal article supplement (doi:10.1038/s41596-021-00635-w), 2022-01-01
Supplement: MOESM5 [file 41596_2021_635_MOESM5_ESM36.xlsx]

## Sheet: Source data Figs. 12c + ED 7-9
Sample description	Sample name + repeat	Target Gene	Cq value from qRT-PCR
HBMEC plated in 2D	HBMEC 2D - 1	18S	7.63152		Normalization by 18S for each plate/sample
	HBMEC 2D - 1	JAM-A	22.8498
	HBMEC 2D - 1	MRP2	32.8426
	HBMEC 2D - 1	GAPDH	20.3494
	HBMEC 2D - 1	VCAM1	28.3092
	HBMEC 2D - 1	BCRP
	HBMEC 2D - 1	VE-CAD	22.3003
	HBMEC 2D - 1	PDGFB	28.2267
	HBMEC 2D - 1	GLUT1	28.2299
	HBMEC 2D - 1	ZO-1	25.993
	HBMEC 2D - 1	LRP1	29.2765
	HBMEC 2D - 1	LAT1	25.9292
	HBMEC 2D - 1	OCLN	29.9035
	HBMEC 2D - 1	TFRC	27.4635
	HBMEC 2D - 1	MOT1	24.8825
	HBMEC 2D - 1	CLDN1	32.2775
	HBMEC 2D - 1	CERP	32.382
	HBMEC 2D - 1	RAGE	32.9002
	HBMEC 2D - 1	CLDN3	32.8267
	HBMEC 2D - 1	P-GP	31.3491
	HBMEC 2D - 1	CAT1	25.7135
	HBMEC 2D - 1	CLDN5	22.5345
	HBMEC 2D - 1	MRP1	26.1245
	HBMEC 2D - 1	MFSD2A	30.5663
	HBMEC 2D - 2	18S	7.13253
	HBMEC 2D - 2	JAM-A	22.7837
	HBMEC 2D - 2	MRP2	32.9978
	HBMEC 2D - 2	GAPDH	20.1396
	HBMEC 2D - 2	VCAM1	27.5668
	HBMEC 2D - 2	BCRP	31.8886
	HBMEC 2D - 2	VE-CAD	21.2927
	HBMEC 2D - 2	PDGFB	28.0361
	HBMEC 2D - 2	GLUT1	28.1697
	HBMEC 2D - 2	ZO-1	25.6972
	HBMEC 2D - 2	LRP1	29.2756
	HBMEC 2D - 2	LAT1	26.1079
	HBMEC 2D - 2	OCLN	29.8738
	HBMEC 2D - 2	TFRC	27.5454
	HBMEC 2D - 2	MOT1	24.7135
	HBMEC 2D - 2	CLDN1	32.6142
	HBMEC 2D - 2	CERP	32.0145
	HBMEC 2D - 2	RAGE	33.1593
	HBMEC 2D - 2	CLDN3	31.5992
	HBMEC 2D - 2	P-GP	31.5398
	HBMEC 2D - 2	CAT1	25.6529
	HBMEC 2D - 2	CLDN5	22.4839
	HBMEC 2D - 2	MRP1	26.0202
	HBMEC 2D - 2	MFSD2A	31.1831
	HBMEC 2D - 3	18S	9.05966
	HBMEC 2D - 3	JAM-A	23.5283
	HBMEC 2D - 3	MRP2	34.1909
	HBMEC 2D - 3	GAPDH	21.1744
	HBMEC 2D - 3	VCAM1	28.3972
	HBMEC 2D - 3	BCRP
	HBMEC 2D - 3	VE-CAD	22.4593
	HBMEC 2D - 3	PDGFB	29.1869
	HBMEC 2D - 3	GLUT1	28.9496
	HBMEC 2D - 3	ZO-1	26.32
	HBMEC 2D - 3	LRP1	29.7815
	HBMEC 2D - 3	LAT1	26.3647
	HBMEC 2D - 3	OCLN	30.3771
	HBMEC 2D - 3	TFRC	28.1149
	HBMEC 2D - 3	MOT1	25.3876
	HBMEC 2D - 3	CLDN1	32.9024
	HBMEC 2D - 3	CERP	33.0561
	HBMEC 2D - 3	RAGE	33.3281
	HBMEC 2D - 3	CLDN3	32.7228
	HBMEC 2D - 3	P-GP	32.1558
	HBMEC 2D - 3	CAT1	26.2787
	HBMEC 2D - 3	CLDN5	23.1552
	HBMEC 2D - 3	MRP1	26.6946
	HBMEC 2D - 3	MFSD2A	31.6292
iPS-EC plated in 2D	IPSEC 2D - 1	18S	7.06862
	IPSEC 2D - 1	JAM-A	22.971
	IPSEC 2D - 1	MRP2	34.0481
	IPSEC 2D - 1	GAPDH	21.1816
	IPSEC 2D - 1	VCAM1	33.166
	IPSEC 2D - 1	BCRP	28.4644
	IPSEC 2D - 1	VE-CAD	20.0923
	IPSEC 2D - 1	PDGFB	24.396
	IPSEC 2D - 1	GLUT1	25.778
	IPSEC 2D - 1	ZO-1	25.4388
	IPSEC 2D - 1	LRP1	30.3399
	IPSEC 2D - 1	LAT1	27.6243
	IPSEC 2D - 1	OCLN	29.3486
	IPSEC 2D - 1	TFRC	26.3632
	IPSEC 2D - 1	MOT1	24.4145
	IPSEC 2D - 1	CLDN1	29.7063
	IPSEC 2D - 1	CERP	28.9064
	IPSEC 2D - 1	RAGE	32.0503
	IPSEC 2D - 1	CLDN3	35.0487
	IPSEC 2D - 1	P-GP	35.292
	IPSEC 2D - 1	CAT1	26.8746
	IPSEC 2D - 1	CLDN5	23.9012
	IPSEC 2D - 1	MRP1	25.2135
	IPSEC 2D - 1	MFSD2A	31.1383
	IPSEC 2D - 2	18S	7.71116
	IPSEC 2D - 2	JAM-A	22.5457
	IPSEC 2D - 2	MRP2	34.4629
	IPSEC 2D - 2	GAPDH	20.9253
	IPSEC 2D - 2	VCAM1	33.2725
	IPSEC 2D - 2	BCRP	28.137
	IPSEC 2D - 2	VE-CAD	19.8997
	IPSEC 2D - 2	PDGFB	24.4518
	IPSEC 2D - 2	GLUT1	25.5327
	IPSEC 2D - 2	ZO-1	25.2671
	IPSEC 2D - 2	LRP1	30.2273
	IPSEC 2D - 2	LAT1	27.3228
	IPSEC 2D - 2	OCLN	29.2856
	IPSEC 2D - 2	TFRC	26.0329
	IPSEC 2D - 2	MOT1	24.2959
	IPSEC 2D - 2	CLDN1	29.2734
	IPSEC 2D - 2	CERP	28.1172
	IPSEC 2D - 2	RAGE	32.2545
	IPSEC 2D - 2	CLDN3	34.4479
	IPSEC 2D - 2	P-GP	34.974
	IPSEC 2D - 2	CAT1	26.8896
	IPSEC 2D - 2	CLDN5	25.1871
	IPSEC 2D - 2	MRP1	25.7039
	IPSEC 2D - 2	MFSD2A	30.9214
	IPSEC 2D - 3	18S	9.41866
	IPSEC 2D - 3	JAM-A	23.2527
	IPSEC 2D - 3	MRP2	35.621
	IPSEC 2D - 3	GAPDH	22.1078
	IPSEC 2D - 3	VCAM1	34.2129
	IPSEC 2D - 3	BCRP	29.0588
	IPSEC 2D - 3	VE-CAD	20.7634
	IPSEC 2D - 3	PDGFB	25.2167
	IPSEC 2D - 3	GLUT1	26.414
	IPSEC 2D - 3	ZO-1	26.1439
	IPSEC 2D - 3	LRP1	31.242
	IPSEC 2D - 3	LAT1	28.3759
	IPSEC 2D - 3	OCLN	30.2049
	IPSEC 2D - 3	TFRC	27.112
	IPSEC 2D - 3	MOT1	25.0976
	IPSEC 2D - 3	CLDN1	30.2389
	IPSEC 2D - 3	CERP	29.0212
	IPSEC 2D - 3	RAGE	33.1472
	IPSEC 2D - 3	CLDN3	35.793
	IPSEC 2D - 3	P-GP	34.7813
	IPSEC 2D - 3	CAT1	27.2677
	IPSEC 2D - 3	CLDN5	24.5892
	IPSEC 2D - 3	MRP1	26.5487
	IPSEC 2D - 3	MFSD2A	31.9081
Mono-culture of iPS-EC MVNs in a 3D microfluidic device	MONO - 1	18S	9.41885
	MONO - 1	JAM-A	25.6522
	MONO - 1	MRP2	35.157
	MONO - 1	GAPDH	24.2074
	MONO - 1	VCAM1	35.3582
	MONO - 1	BCRP	32.1556
	MONO - 1	VE-CAD	22.9597
	MONO - 1	PDGFB	27.1512
	MONO - 1	GLUT1	28.4336
	MONO - 1	ZO-1	27.3287
	MONO - 1	LRP1	30.0219
	MONO - 1	LAT1	28.7914
	MONO - 1	OCLN	29.2343
	MONO - 1	TFRC	29.0781
	MONO - 1	MOT1	27.5139
	MONO - 1	CLDN1	30.0466
	MONO - 1	CERP	31.1351
	MONO - 1	RAGE	33.1869
	MONO - 1	CLDN3	31.563
	MONO - 1	P-GP	34.496
	MONO - 1	CAT1	28.2575
	MONO - 1	CLDN5	23.5693
	MONO - 1	MRP1	28.7764
	MONO - 1	MFSD2A	33.2478
	MONO - 2	18S	8.39256
	MONO - 2	JAM-A	25.6587
	MONO - 2	MRP2	35.0491
	MONO - 2	GAPDH	24.2357
	MONO - 2	VCAM1	34.2591
	MONO - 2	BCRP	32.4192
	MONO - 2	VE-CAD	22.9513
	MONO - 2	PDGFB	26.6661
	MONO - 2	GLUT1	28.2974
	MONO - 2	ZO-1	27.4839
	MONO - 2	LRP1	29.4823
	MONO - 2	LAT1	28.813
	MONO - 2	OCLN	29.4535
	MONO - 2	TFRC	29.0368
	MONO - 2	MOT1	27.629
	MONO - 2	CLDN1	29.8376
	MONO - 2	CERP	31.0836
	MONO - 2	RAGE	32.4762
	MONO - 2	CLDN3	31.4206
	MONO - 2	P-GP	35.4193
	MONO - 2	CAT1	28.006
	MONO - 2	CLDN5	25.1683
	MONO - 2	MRP1	28.8001
	MONO - 2	MFSD2A	33.0987
	MONO - 3	18S	10.3747
	MONO - 3	JAM-A	25.9229
	MONO - 3	MRP2	35.7834
	MONO - 3	GAPDH	24.7463
	MONO - 3	VCAM1	34.6615
	MONO - 3	BCRP	32.8093
	MONO - 3	VE-CAD	23.1735
	MONO - 3	PDGFB	27.2517
	MONO - 3	GLUT1	28.8501
	MONO - 3	ZO-1	28.1108
	MONO - 3	LRP1	30.3041
	MONO - 3	LAT1	29.4503
	MONO - 3	OCLN	30.6353
	MONO - 3	TFRC	29.7437
	MONO - 3	MOT1	28.0015
	MONO - 3	CLDN1	30.2368
	MONO - 3	CERP	31.18
	MONO - 3	RAGE	33.0382
	MONO - 3	CLDN3	33.8955
	MONO - 3	P-GP	33.9731
	MONO - 3	CAT1	28.6815
	MONO - 3	CLDN5	24.5923
	MONO - 3	MRP1	29.0102
	MONO - 3	MFSD2A	34.1621
Tri-culture of iPS-EC MVNs with pericytes and astrocytes in a 3D microfluidic device (only iPS-EC were extracted)	TRI-iPSECs - 1	18S	19.3909
	TRI-iPSECs - 1	JAM-A	32.951
	TRI-iPSECs - 1	MRP2	39.1016
	TRI-iPSECs - 1	GAPDH	32.3694
	TRI-iPSECs - 1	VCAM1
	TRI-iPSECs - 1	BCRP	5.54284
	TRI-iPSECs - 1	VE-CAD	29.9233
	TRI-iPSECs - 1	PDGFB	33.5804
	TRI-iPSECs - 1	GLUT1	35.1721
	TRI-iPSECs - 1	ZO-1	34.5764
	TRI-iPSECs - 1	LRP1	40.1545
	TRI-iPSECs - 1	LAT1	34.2251
	TRI-iPSECs - 1	OCLN	33.47
	TRI-iPSECs - 1	TFRC	35.8722
	TRI-iPSECs - 1	MOT1	35.1353
	TRI-iPSECs - 1	CLDN1
	TRI-iPSECs - 1	CERP	37.5957
	TRI-iPSECs - 1	RAGE	37.6265
	TRI-iPSECs - 1	CLDN3	36.0118
	TRI-iPSECs - 1	P-GP
	TRI-iPSECs - 1	CAT1	34.006
	TRI-iPSECs - 1	CLDN5	33.0657
	TRI-iPSECs - 1	MRP1	34.8854
	TRI-iPSECs - 1	MFSD2A
	TRI-iPSECs - 2	18S	21.7573
	TRI-iPSECs - 2	JAM-A	34.3623
	TRI-iPSECs - 2	MRP2
	TRI-iPSECs - 2	GAPDH	34.0169
	TRI-iPSECs - 2	VCAM1
	TRI-iPSECs - 2	BCRP	39.0937
	TRI-iPSECs - 2	VE-CAD	31.0248
	TRI-iPSECs - 2	PDGFB	34.795
	TRI-iPSECs - 2	GLUT1	35.2553
	TRI-iPSECs - 2	ZO-1	35.2173
	TRI-iPSECs - 2	LRP1	39.3286
	TRI-iPSECs - 2	LAT1	35.3972
	TRI-iPSECs - 2	OCLN	36.2147
	TRI-iPSECs - 2	TFRC	37.9545
	TRI-iPSECs - 2	MOT1	35.8019
	TRI-iPSECs - 2	CLDN1	38.0402
	TRI-iPSECs - 2	CERP	38.1429
	TRI-iPSECs - 2	RAGE
	TRI-iPSECs - 2	CLDN3	37.8841
	TRI-iPSECs - 2	P-GP
	TRI-iPSECs - 2	CAT1	35.7355
	TRI-iPSECs - 2	CLDN5	34.0228
	TRI-iPSECs - 2	MRP1	35.9414
	TRI-iPSECs - 2	MFSD2A
	TRI-iPSECs - 3	18S	20.6182
	TRI-iPSECs - 3	JAM-A	34.3215
	TRI-iPSECs - 3	MRP2
	TRI-iPSECs - 3	GAPDH	32.0557
	TRI-iPSECs - 3	VCAM1
	TRI-iPSECs - 3	BCRP
	TRI-iPSECs - 3	VE-CAD	31.2857
	TRI-iPSECs - 3	PDGFB	33.8282
	TRI-iPSECs - 3	GLUT1	37.8067
	TRI-iPSECs - 3	ZO-1	35.5766
	TRI-iPSECs - 3	LRP1	37.1065
	TRI-iPSECs - 3	LAT1	35.1277
	TRI-iPSECs - 3	OCLN	32.7545
	TRI-iPSECs - 3	TFRC	36.8504
	TRI-iPSECs - 3	MOT1	34.4823
	TRI-iPSECs - 3	CLDN1	37.6802
	TRI-iPSECs - 3	CERP	38.5942
	TRI-iPSECs - 3	RAGE
	TRI-iPSECs - 3	CLDN3
	TRI-iPSECs - 3	P-GP
	TRI-iPSECs - 3	CAT1	34.9853
	TRI-iPSECs - 3	CLDN5
	TRI-iPSECs - 3	MRP1	34.6583
	TRI-iPSECs - 3	MFSD2A
Tri-culture of HBMEC MVNs with pericytes and astrocytes in a 3D microfluidic device (only HBMEC were extracted)	TRI-HBMECs - 1	18S	17.6977
	TRI-HBMECs - 1	JAM-A	30.1291
	TRI-HBMECs - 1	MRP2
	TRI-HBMECs - 1	GAPDH	29.6176
	TRI-HBMECs - 1	VCAM1	36.1637
	TRI-HBMECs - 1	BCRP
	TRI-HBMECs - 1	VE-CAD	28.2435
	TRI-HBMECs - 1	PDGFB	32.0449
	TRI-HBMECs - 1	GLUT1	34.4103
	TRI-HBMECs - 1	ZO-1	32.4446
	TRI-HBMECs - 1	LRP1	35.3121
	TRI-HBMECs - 1	LAT1	33.2258
	TRI-HBMECs - 1	OCLN	32.7238
	TRI-HBMECs - 1	TFRC	34.4725
	TRI-HBMECs - 1	MOT1	32.9871
	TRI-HBMECs - 1	CLDN1
	TRI-HBMECs - 1	CERP	38.3271
	TRI-HBMECs - 1	RAGE	40.6698
	TRI-HBMECs - 1	CLDN3	35.0397
	TRI-HBMECs - 1	P-GP	35.3736
	TRI-HBMECs - 1	CAT1	33.0002
	TRI-HBMECs - 1	CLDN5	30.4983
	TRI-HBMECs - 1	MRP1	33.2118
	TRI-HBMECs - 1	MFSD2A	39.0097
	TRI-HBMECs - 2	18S	18.0281
	TRI-HBMECs - 2	JAM-A	30.9315
	TRI-HBMECs - 2	MRP2
	TRI-HBMECs - 2	GAPDH	29.8221
	TRI-HBMECs - 2	VCAM1	35.701
	TRI-HBMECs - 2	BCRP
	TRI-HBMECs - 2	VE-CAD	28.4232
	TRI-HBMECs - 2	PDGFB	31.8599
	TRI-HBMECs - 2	GLUT1	35.752
	TRI-HBMECs - 2	ZO-1	33.2282
	TRI-HBMECs - 2	LRP1	35.5419
	TRI-HBMECs - 2	LAT1	34.3674
	TRI-HBMECs - 2	OCLN	33.1119
	TRI-HBMECs - 2	TFRC	34.1771
	TRI-HBMECs - 2	MOT1	32.7152
	TRI-HBMECs - 2	CLDN1	38.9411
	TRI-HBMECs - 2	CERP	39.0582
	TRI-HBMECs - 2	RAGE	37.0049
	TRI-HBMECs - 2	CLDN3	34.0002
	TRI-HBMECs - 2	P-GP
	TRI-HBMECs - 2	CAT1	32.8738
	TRI-HBMECs - 2	CLDN5	32.0104
	TRI-HBMECs - 2	MRP1	34.1883
	TRI-HBMECs - 2	MFSD2A
	TRI-HBMECs - 3	18S	15.7707
	TRI-HBMECs - 3	JAM-A	28.1535
	TRI-HBMECs - 3	MRP2	39.1372
	TRI-HBMECs - 3	GAPDH	27.1553
	TRI-HBMECs - 3	VCAM1	35.2794
	TRI-HBMECs - 3	BCRP
	TRI-HBMECs - 3	VE-CAD	26.0933
	TRI-HBMECs - 3	PDGFB	29.6709
	TRI-HBMECs - 3	GLUT1	32.6746
	TRI-HBMECs - 3	ZO-1	30.2406
	TRI-HBMECs - 3	LRP1	33.4774
	TRI-HBMECs - 3	LAT1	31.2846
	TRI-HBMECs - 3	OCLN	32.1901
	TRI-HBMECs - 3	TFRC	31.6089
	TRI-HBMECs - 3	MOT1	30.2185
	TRI-HBMECs - 3	CLDN1	36.0464
	TRI-HBMECs - 3	CERP	36.2335
	TRI-HBMECs - 3	RAGE	36.4398
	TRI-HBMECs - 3	CLDN3	33.7894
	TRI-HBMECs - 3	P-GP	36.793
	TRI-HBMECs - 3	CAT1	30.7084
	TRI-HBMECs - 3	CLDN5	28.9109
	TRI-HBMECs - 3	MRP1	33.5514
	TRI-HBMECs - 3	MFSD2A	36.3334
