# Supplementary material for: Engineered human blood–brain barrier microfluidic model for vascular permeability analyses
Source: Springer Nature journal article supplement (doi:10.1038/s41596-021-00635-w), 2022-01-01
Supplement: MOESM8 [file 41596_2021_635_MOESM8_ESM37.xlsx]

## Sheet: Sheet1
Sample	t (s)	Iv	Im	Vv	Vm	Vv%	SAv	SSA (µm-1)	d (µm)	R	P (μm/s)	P (cm/s)
test	0	1515.6	173.961	21700000	18700000	0.537129	2560000	0.0633663	33.9062	7.30469
	720	1571.92	196.589								0.000171111	1.71111e-08
example values in red
Iv	vascular intensity
Im	matrix intensity
Vv	vascular volume
Vm	matrix volume
Vv%	vascular density (volume fraction)
SAv	vascular surface area
SSA	vasular specific surface area
d	average vessel diameter
R	morphological ratio for permeability
